# Supplementary material for: Effects of different rehydration temperatures on rehydration and nutritional quality of dried daylily
Source: PeerJ. 2025 Dec 16;13:e20408. doi: 10.7717/peerj.20408 (PMC12716133; doi:10.7717/peerj.20408)
Supplement: Supplemental Information 1 [file peerj-13-20408-s001.xlsx]

## Sheet: Weight
Raw data of weight under different rehydration conditions
	Weight (g)
25°C-0h-1	0.611111
25°C-0h-2	0.472222
25°C-0h-3	0.305556
25°C-0.5h-1	1.29167
25°C-0.5h-2	1.09722
25°C-0.5h-3	0.902778
25°C-2h-1	1.45833
25°C-2h-2	1.23611
25°C-2h-3	0.958333
25°C-4h-1	1.59722
25°C-4h-2	1.33333
25°C-4h-3	1.08333
50°C-0h-1	0.611111
50°C-0h-2	0.458333
50°C-0h-3	0.333333
50°C-0.5h-1	1.38889
50°C-0.5h-2	1.19444
50°C-0.5h-3	1.01389
50°C-2h-1	1.54167
50°C-2h-2	1.34722
50°C-2h-3	1.15278
50°C-4h-1	1.66667
50°C-4h-2	1.43056
50°C-4h-3	1.23611
70°C-0h-1	0.611111
70°C-0h-2	0.458333
70°C-0h-3	0.305556
70°C-0.5h-1	1.875
70°C-0.5h-2	1.68056
70°C-0.5h-3	1.48611
70°C-2h-1	2.11111
70°C-2h-2	1.93056
70°C-2h-3	1.72222
70°C-4h-1	2.23611
70°C-4h-2	2.04167
70°C-4h-3	1.83333

## Sheet: Rehydration ratio
Raw data of rehydration ratio under different rehydration conditions
	Rehydration ratio
25°C-0h-1	1
25°C-0h-2	1
25°C-0h-3	1
25°C-0.5h-1	2.73743
25°C-0.5h-2	2.34637
25°C-0.5h-3	1.92737
25°C-2h-1	3.12849
25°C-2h-2	2.6257
25°C-2h-3	2.15084
25°C-4h-1	3.40782
25°C-4h-2	2.84916
25°C-4h-3	2.34637
50°C-0h-1	1
50°C-0h-2	1
50°C-0h-3	1
50°C-0.5h-1	2.93296
50°C-0.5h-2	2.56983
50°C-0.5h-3	2.2067
50°C-2h-1	3.35196
50°C-2h-2	2.93296
50°C-2h-3	2.48603
50°C-4h-1	3.54749
50°C-4h-2	3.07263
50°C-4h-3	2.59777
70°C-0h-1	1
70°C-0h-2	1
70°C-0h-3	1
70°C-0.5h-1	4.02235
70°C-0.5h-2	3.63128
70°C-0.5h-3	3.18436
70°C-2h-1	4.52514
70°C-2h-2	4.10615
70°C-2h-3	3.65922
70°C-4h-1	4.77654
70°C-4h-2	4.38547
70°C-4h-3	3.96648

## Sheet: Average rehydration ratio rate
Raw data of average rehydration ratio rate under different rehydration conditions
	Rehydration ratio rate
25°C-0~0.5h-1	1.46939
25°C-0~0.5h-2	1.2551
25°C-0~0.5h-3	1.04082
25°C-0.5~2h-1	0.122449
25°C-0.5~2h-2	0.0765306
25°C-0.5~2h-3	0.0612245
25°C-2~4h-1	0.0765306
25°C-2~4h-2	0.0612245
25°C-2~4h-3	0.0459184
50°C-0~0.5h-1	1.69898
50°C-0~0.5h-2	1.5
50°C-0~0.5h-3	1.30102
50°C-0.5~2h-1	0.122449
50°C-0.5~2h-2	0.107143
50°C-0.5~2h-3	0.0765306
50°C-2~4h-1	0.0459184
50°C-2~4h-2	0.0459184
50°C-2~4h-3	0.0306122
70°C-0~0.5h-1	2.72449
70°C-0~0.5h-2	2.43367
70°C-0~0.5h-3	2.17347
70°C-0.5~2h-1	0.183673
70°C-0.5~2h-2	0.153061
70°C-0.5~2h-3	0.137755
70°C-2~4h-1	0.0765306
70°C-2~4h-2	0.0612245
70°C-2~4h-3	0.0459184

## Sheet: Lignin
Raw data of lignin content under different rehydration conditions
	Content (mg/g DW)
25°C-0h-1	28.913
25°C-0h-2	28.2609
25°C-0h-3	27.3913
25°C-0.5h-1	30.4348
25°C-0.5h-2	28.0435
25°C-0.5h-3	25.4348
25°C-2h-1	33.4783
25°C-2h-2	29.3478
25°C-2h-3	25.4348
25°C-4h-1	33.6957
25°C-4h-2	28.913
25°C-4h-3	24.1304
50°C-0h-1	28.913
50°C-0h-2	28.2609
50°C-0h-3	27.3913
50°C-0.5h-1	29.5652
50°C-0.5h-2	26.9565
50°C-0.5h-3	24.3478
50°C-2h-1	29.1304
50°C-2h-2	27.3913
50°C-2h-3	25.4348
50°C-4h-1	27.1739
50°C-4h-2	26.3043
50°C-4h-3	25.4348
70°C-0h-1	29.1304
70°C-0h-2	28.2609
70°C-0h-3	27.3913
70°C-0.5h-1	29.3478
70°C-0.5h-2	26.5217
70°C-0.5h-3	23.6957
70°C-2h-1	30.4348
70°C-2h-2	25.6522
70°C-2h-3	21.087
70°C-4h-1	28.6957
70°C-4h-2	28.2609
70°C-4h-3	27.8261

## Sheet: Cellulose 
Raw data of cellulose content under different rehydration conditions
	Content (mg/g DW)
25°C-0h-1	77.2603
25°C-0h-2	66.3014
25°C-0h-3	54.7945
25°C-0.5h-1	70.137
25°C-0.5h-2	67.3973
25°C-0.5h-3	64.6575
25°C-2h-1	82.1918
25°C-2h-2	67.9452
25°C-2h-3	54.2466
25°C-4h-1	66.3014
25°C-4h-2	64.6575
25°C-4h-3	63.5616
50°C-0h-1	77.2603
50°C-0h-2	65.7534
50°C-0h-3	54.7945
50°C-0.5h-1	73.9726
50°C-0.5h-2	64.1096
50°C-0.5h-3	54.2466
50°C-2h-1	70.6849
50°C-2h-2	61.3699
50°C-2h-3	52.0548
50°C-4h-1	72.8767
50°C-4h-2	64.1096
50°C-4h-3	55.8904
70°C-0h-1	77.2603
70°C-0h-2	66.3014
70°C-0h-3	54.7945
70°C-0.5h-1	71.2329
70°C-0.5h-2	66.8493
70°C-0.5h-3	61.3699
70°C-2h-1	68.4932
70°C-2h-2	64.1096
70°C-2h-3	60.274
70°C-4h-1	70.137
70°C-4h-2	66.8493
70°C-4h-3	63.5616

## Sheet: Flavonoid
Raw data of flavonoid content under different rehydration conditions
	Content (mg/g DW)
25°C-0h-1	15.4545
25°C-0h-2	14.3062
25°C-0h-3	13.11
25°C-0.5h-1	11.2919
25°C-0.5h-2	10.3349
25°C-0.5h-3	9.37799
25°C-2h-1	6.31579
25°C-2h-2	6.02871
25°C-2h-3	5.83732
25°C-4h-1	6.36364
25°C-4h-2	5.45455
25°C-4h-3	4.64115
50°C-0h-1	15.4545
50°C-0h-2	14.3062
50°C-0h-3	13.11
50°C-0.5h-1	10.0957
50°C-0.5h-2	9.85646
50°C-0.5h-3	9.66507
50°C-2h-1	6.02871
50°C-2h-2	5.45455
50°C-2h-3	4.92823
50°C-4h-1	5.55024
50°C-4h-2	5.4067
50°C-4h-3	5.311
70°C-0h-1	15.4545
70°C-0h-2	14.2584
70°C-0h-3	13.11
70°C-0.5h-1	10.622
70°C-0.5h-2	9.80861
70°C-0.5h-3	8.99522
70°C-2h-1	4.83254
70°C-2h-2	4.49761
70°C-2h-3	4.25837
70°C-4h-1	4.73684
70°C-4h-2	4.40191
70°C-4h-3	4.06699

## Sheet: Total carotenoid
Raw data of total carotenoid content under different rehydration conditions
	Content (μg/g DW)
25°C-0h-1	63.1175
25°C-0h-2	56.235
25°C-0h-3	49.5204
25°C-0.5h-1	35.5875
25°C-0.5h-2	32.3981
25°C-0.5h-3	29.5444
25°C-2h-1	27.0264
25°C-2h-2	23.3333
25°C-2h-3	19.976
25°C-4h-1	25.5156
25°C-4h-2	21.3189
25°C-4h-3	17.7938
50°C-0h-1	62.9496
50°C-0h-2	56.235
50°C-0h-3	49.5204
50°C-0.5h-1	32.7338
50°C-0.5h-2	29.0408
50°C-0.5h-3	26.0192
50°C-2h-1	23.6691
50°C-2h-2	21.6547
50°C-2h-3	19.8082
50°C-4h-1	21.8225
50°C-4h-2	20.3118
50°C-4h-3	18.801
70°C-0h-1	63.1175
70°C-0h-2	56.235
70°C-0h-3	49.5204
70°C-0.5h-1	25.6835
70°C-0.5h-2	21.4868
70°C-0.5h-3	17.7938
70°C-2h-1	20.6475
70°C-2h-2	18.4652
70°C-2h-3	16.4508
70°C-4h-1	18.801
70°C-4h-2	17.1223
70°C-4h-3	15.7794

## Sheet: Soluble sugar
Raw data of soluble sugar content under different rehydration conditions
	Content (mg/g DW)
25°C-0h-1	76.7179
25°C-0h-2	76.1026
25°C-0h-3	74.8718
25°C-0.5h-1	68.9231
25°C-0.5h-2	67.6923
25°C-0.5h-3	66.6667
25°C-2h-1	67.0769
25°C-2h-2	62.359
25°C-2h-3	57.8462
25°C-4h-1	59.8974
25°C-4h-2	56.8205
25°C-4h-3	53.9487
50°C-0h-1	76.9231
50°C-0h-2	75.6923
50°C-0h-3	74.8718
50°C-0.5h-1	56.8205
50°C-0.5h-2	52.1026
50°C-0.5h-3	47.5897
50°C-2h-1	53.5385
50°C-2h-2	50.4615
50°C-2h-3	47.3846
50°C-4h-1	40.4103
50°C-4h-2	40
50°C-4h-3	39.5897
70°C-0h-1	76.7179
70°C-0h-2	75.6923
70°C-0h-3	74.8718
70°C-0.5h-1	49.0256
70°C-0.5h-2	46.1538
70°C-0.5h-3	43.0769
70°C-2h-1	36.9231
70°C-2h-2	35.8974
70°C-2h-3	35.0769
70°C-4h-1	35.2821
70°C-4h-2	34.4615
70°C-4h-3	33.641

## Sheet: Polyphenol 
Raw data of polyphenol content under different rehydration conditions
	Content (mg/g FW)
25°C-0h-1	0.200471
25°C-0h-2	0.177882
25°C-0h-3	0.155294
25°C-0.5h-1	0.177882
25°C-0.5h-2	0.159529
25°C-0.5h-3	0.141882
25°C-2h-1	0.127765
25°C-2h-2	0.103059
25°C-2h-3	0.0776471
25°C-4h-1	0.108
25°C-4h-2	0.0804706
25°C-4h-3	0.0543529
50°C-0h-1	0.201882
50°C-0h-2	0.178588
50°C-0h-3	0.155294
50°C-0.5h-1	0.182824
50°C-0.5h-2	0.158118
50°C-0.5h-3	0.133412
50°C-2h-1	0.12
50°C-2h-2	0.0896471
50°C-2h-3	0.0585882
50°C-4h-1	0.0967059
50°C-4h-2	0.0656471
50°C-4h-3	0.0345882
70°C-0h-1	0.200471
70°C-0h-2	0.177882
70°C-0h-3	0.155294
70°C-0.5h-1	0.172941
70°C-0.5h-2	0.145412
70°C-0.5h-3	0.119294
70°C-2h-1	0.084
70°C-2h-2	0.0755294
70°C-2h-3	0.0684706
70°C-4h-1	0.0818824
70°C-4h-2	0.0705882
70°C-4h-3	0.0585882
